# Supplementary material for: Integrating virtual reality and exergaming in cognitive rehabilitation of patients with Parkinson disease: a systematic review of randomized controlled trials
Source: PubMed Central journal article supplement — Eur J Phys Rehabil Med. 2022 Sep 28;58(6):818–26. doi: 10.23736/S1973-9087.22.07643-2 (PMC10081485; doi:10.23736/s1973-9087.22.07643-2), 2022-09-28
Supplement: Supplementary_Digital_Material1.pdf [file Supplementary_Digital_Material1.pdf]

SUPPLEMENTARY DIGITAL MATERIAL 1

Supplementary Table I.—Main characteristics of the studies included in this systematic review.

| Authors                                             | Journal                | Nation    | Population (M/F)           | Age (years)            | H&Y | Intervention                                                                                                                                                                                                                                                                                        | Control                                                       | Outcome                                                                                                                                             | Main Findings                                                                                                           |
|-----------------------------------------------------|------------------------|-----------|----------------------------|------------------------|-----|-----------------------------------------------------------------------------------------------------------------------------------------------------------------------------------------------------------------------------------------------------------------------------------------------------|---------------------------------------------------------------|-----------------------------------------------------------------------------------------------------------------------------------------------------|-------------------------------------------------------------------------------------------------------------------------|
| Allen NE<br><i>et al.</i> <a href="#">2017</a><br>— | Park. Relat<br>Disord. | Australia | Total:<br>n=38; 23<br>/15  | Total: N/A             | ≤V  | Group 1:<br>Participants performed<br>exergames 3 times<br>/week for 12<br>weeks. Two<br>exergames<br>focusing on<br>coordinated<br>movements of the<br>arm and hand. Both<br>games were played<br>with one upper<br>extremity at a time,<br>and were played<br>with either the<br>whole arm or the | Group 2:<br>Usual care<br>continue with<br>home<br>activities | TMT-A;<br>TMT-B;<br>MOCA score<br>(secondary<br>outcomes in<br>the study).<br>Data were<br>collected at<br>T0 (baseline)<br>and at T1 (12<br>weeks) | Group 1<br>improved<br>their time<br>compared to<br>the group 2<br>for the Trail<br>Making Test<br>Part A (p =<br>0.07) |
|                                                     |                        |           | Group 1<br>n=19; 12<br>/7  | Group 1:<br>67.5 ± 7.3 |     |                                                                                                                                                                                                                                                                                                     |                                                               |                                                                                                                                                     |                                                                                                                         |
|                                                     |                        |           | Group 2:<br>n= 19;<br>11/8 | Group 2:<br>68.4 ± 8.5 |     |                                                                                                                                                                                                                                                                                                     |                                                               |                                                                                                                                                     |                                                                                                                         |

|                             |                       |        |                           |                              |      |                                                                                                                                                                                                                                |                                                                                                    |                                                                                                                                                               |                                                                                                                           |
|-----------------------------|-----------------------|--------|---------------------------|------------------------------|------|--------------------------------------------------------------------------------------------------------------------------------------------------------------------------------------------------------------------------------|----------------------------------------------------------------------------------------------------|---------------------------------------------------------------------------------------------------------------------------------------------------------------|---------------------------------------------------------------------------------------------------------------------------|
|                             |                       |        |                           |                              |      | hand. A full exergame session comprised of playing each game under six conditions, so that 12 games were played per session                                                                                                    |                                                                                                    |                                                                                                                                                               |                                                                                                                           |
| Alves<br>MLM et<br>2018 al. | Percept.<br>Mot. Ski. | Brazil | Total:<br>n=27; 25 /<br>2 | Total:<br>61 ± 10.7          | ≤III | Group 1: Nintendo Wii™ group performed 10 individual training games, Games were Rhythm Parade, Obstacle Course, Tightrope Walk, and Basic Step. Group 2: Xbox Kinect™ group performed 10 individual training games. Games were | Group 3: The control group received no training of any type during the 5-week game training period | Digit Span forward and backward; Verbal Fluency Test; BAI (secondary outcomes in the study). Data were collected T0 (baseline), T1 (5 weeks) and T2 (9 weeks) | Group 1 showed improved scores on Digit Span backward at T1, (p = 0.002), BAI scores at T1(p = 0.045), and T2 (p = 0.031) |
|                             |                       |        | Group 1:<br>n= 9; 9 /0    | Group 1:<br>58.89 ±<br>11.16 |      |                                                                                                                                                                                                                                |                                                                                                    |                                                                                                                                                               |                                                                                                                           |
|                             |                       |        | Group 2:<br>n=9;8 /1      | Group 2:<br>62.67 ±<br>13.81 |      |                                                                                                                                                                                                                                |                                                                                                    |                                                                                                                                                               |                                                                                                                           |
|                             |                       |        | Group 3:<br>n= 9; 8 /1    | Group 3:<br>61.67 ±<br>10.74 |      |                                                                                                                                                                                                                                |                                                                                                    |                                                                                                                                                               |                                                                                                                           |

|                                      |                                 |         |                              |                            |        |                                                                                                                                                                                                                                  |                                                                                             |                                                                                          |                                                                                               |
|--------------------------------------|---------------------------------|---------|------------------------------|----------------------------|--------|----------------------------------------------------------------------------------------------------------------------------------------------------------------------------------------------------------------------------------|---------------------------------------------------------------------------------------------|------------------------------------------------------------------------------------------|-----------------------------------------------------------------------------------------------|
|                                      |                                 |         |                              |                            |        | Hurdles, River Rush, Reflex Ridge, and Light Race. The physical therapist gave manual and verbal cues to the patient to promote a correct posture and perform movements required to interact with the game and achieve its goals |                                                                                             |                                                                                          |                                                                                               |
| Bekkers<br>EMJ <i>et al.</i><br>2020 | Neurorehabili.<br>Neural Repair | Belgium | Total:<br>n=121;<br>N/A      | Total: N/A                 | II-III | Group 1: Patients performed TT+VR 3 times per week for 6 weeks. Each session lasting 45 minutes. The training was performed on a                                                                                                 | Group 2: Treadmill training, 3 times per week for 6 weeks. Each session lasting 45 minutes. | TMT-B. (secondary outcomes in the study). Data were collected at T0 (baseline), at T1 (6 | A significant effect of time was found for TMT-B scores ( $P < 0.001$ ), indicating that both |
|                                      |                                 |         | Group 1:<br>n= 62; 37<br>/25 | Group 1:<br>71.06 ±<br>6.3 |        |                                                                                                                                                                                                                                  |                                                                                             |                                                                                          |                                                                                               |
|                                      |                                 |         | Group 2:                     | Group 2:                   |        |                                                                                                                                                                                                                                  |                                                                                             |                                                                                          |                                                                                               |

|  |                  |       |                      |                      |        |                                                                                                                                                                                                                                                                                                                                                                 |                                                                                                                                                 |                                    |                                                               |
|--|------------------|-------|----------------------|----------------------|--------|-----------------------------------------------------------------------------------------------------------------------------------------------------------------------------------------------------------------------------------------------------------------------------------------------------------------------------------------------------------------|-------------------------------------------------------------------------------------------------------------------------------------------------|------------------------------------|---------------------------------------------------------------|
|  |                  |       | n= 59;<br>37/22      | 70.86 ±<br>6.0       |        | treadmill with<br>Virtual reality.<br>Every week<br>obstacle levels<br>were increased in<br>height and depth,<br>visibility was<br>reduced from<br>daylight to<br>darkness,<br>distractors in the<br>environment were<br>increased from<br>calm to busy and<br>navigation<br>signposts were<br>reduced from<br>many to none to<br>stimulate memory<br>functions | Gait speed<br>and walking<br>duration were<br>progressively<br>increased<br>using<br>predetermined<br>levels and<br>criteria for<br>progression | weeks), and at<br>T2 (24<br>weeks) | groups<br>benefited<br>equally from<br>both training<br>modes |
|  | Eur. J.<br>Phys. | Italy | Total:<br>n=20; 13/7 | Total:<br>68.0 ± 6.1 | II-III | Group 1 : Patients<br>performed                                                                                                                                                                                                                                                                                                                                 | Group 2:<br>Patients                                                                                                                            | FIM cognitive<br>subscale          | No<br>significant                                             |

|                                 |                  |  |                         |                        |  |                                                                                                                                                                                                                                                                                                                                                                                                                                     |                                                                                                                                                                                          |                                                                                                             |                                                                                      |
|---------------------------------|------------------|--|-------------------------|------------------------|--|-------------------------------------------------------------------------------------------------------------------------------------------------------------------------------------------------------------------------------------------------------------------------------------------------------------------------------------------------------------------------------------------------------------------------------------|------------------------------------------------------------------------------------------------------------------------------------------------------------------------------------------|-------------------------------------------------------------------------------------------------------------|--------------------------------------------------------------------------------------|
| Fundarò C<br><i>et al.</i> 2019 | Rehabil.<br>Med. |  | Group 1:<br>n= 10; 5/5  | Group 1:<br>65.9 ± 6.6 |  | RAGT+VR, 30-<br>min daily sessions,<br>5 days/week for 4<br>weeks. The VR<br>landscape featured<br>an animal (target)<br>that the patient had<br>to reach and catch;<br>the device<br>translated the<br>subject's<br>movement<br>according to the<br>movement of the<br>avatar in the<br>virtual scenery,<br>performing the<br>task requested.<br>This non-<br>immersive virtual<br>application was<br>programmed to<br>calculate a | underwent a<br>training<br>program<br>assisted by a<br>physiotherapis<br>t without use<br>of any<br>technological<br>device, 30-<br>min daily<br>sessions, 5<br>days/week for<br>4 weeks | (primary<br>outcomes in<br>the study).<br>Data were<br>collected at<br>T0 (baseline),<br>at T1 (4<br>weeks) | difference in<br>cognitive<br>assessment<br>was found in<br>both groups<br>(p<0.005) |
|                                 |                  |  | Group 2:<br>n= 10; 8 /2 | Group 2:<br>70.2 ± 4.8 |  |                                                                                                                                                                                                                                                                                                                                                                                                                                     |                                                                                                                                                                                          |                                                                                                             |                                                                                      |

|                              |                             |       |                     |                      |      |                                                                                                                                                                                                                          |                                                                                                                |                                                                                                                                   |                                                                                                                                                    |
|------------------------------|-----------------------------|-------|---------------------|----------------------|------|--------------------------------------------------------------------------------------------------------------------------------------------------------------------------------------------------------------------------|----------------------------------------------------------------------------------------------------------------|-----------------------------------------------------------------------------------------------------------------------------------|----------------------------------------------------------------------------------------------------------------------------------------------------|
|                              |                             |       |                     |                      |      | performance accomplishment score (catching performance score); for correct execution of the selected task, 60 points were added to the game score                                                                        |                                                                                                                |                                                                                                                                   |                                                                                                                                                    |
| Maggio MG <i>et al.</i> 2018 | J Geriatr Psychiatry Neurol | Italy | Total: n=20; 10/10  | Total: 69.4 ± 8.2    | <III | Group 1: Participants underwent a semi-immersive VR system (Nirvana, BTS), 3 sessions a week, 60 minutes each, for 8 weeks. The device is connected to a projector and a big screen, it reproduces an interactive series | Group 2: Usual Cognitive Rehabilitation program was performed, 3 sessions a week, 60 minutes each, for 8 weeks | ACE-R, ACE-R AO; ACE-R M; ACE-R F; ACE-R L; ACE-R VS; BDI; FAB; GDS; HRS-A; MMSE; WEIGL (primary outcomes in the study) Data were | Significant difference between groups were found in ACE-R (p < 0.0001), ACE-R AO (p = <0.001), ACE-R F (p < 0.01), ACE-R VS (p < 0.0001), FAB (p < |
|                              |                             |       | Group 1: n= 10; 6/4 | Group 1: 69.9 ± 6.3  |      |                                                                                                                                                                                                                          |                                                                                                                |                                                                                                                                   |                                                                                                                                                    |
|                              |                             |       | Group 2: n= 10; 4/6 | Group 2: 68.9 ± 10.0 |      |                                                                                                                                                                                                                          |                                                                                                                |                                                                                                                                   |                                                                                                                                                    |

|                             |                               |                    |                       |                     |        |                                                                                                                                                                                                                          |                                                                                                                                          |                                                                                                                                                        |                                                                                                                                                     |
|-----------------------------|-------------------------------|--------------------|-----------------------|---------------------|--------|--------------------------------------------------------------------------------------------------------------------------------------------------------------------------------------------------------------------------|------------------------------------------------------------------------------------------------------------------------------------------|--------------------------------------------------------------------------------------------------------------------------------------------------------|-----------------------------------------------------------------------------------------------------------------------------------------------------|
|                             |                               |                    |                       |                     |        | of exercises, and it creates interactivity thanks to the infrared video camera analyzing the patient's movements.                                                                                                        |                                                                                                                                          | collected at T0 (baseline), at T1 (8 weeks)                                                                                                            | 0.001) and MMSE (p = 0.014) in favor of VR                                                                                                          |
| Maidan I <i>et al.</i> 2018 | Neurorehabilit. Neural Repair | Israel/Net herland | Total: n= 64; 45/19   | Total: N/A          | II-III | Group 1: Participants performed 3 sessions/week for 6 weeks for 45 minutes in each session. Training consisted of walking on a treadmill with requesting to negotiate virtual obstacles presented to them on a screen in | Group 2: Participants practiced 3 sessions/week for 6 weeks for 45 minutes in each session. Training consisted of walking on a treadmill | GGeneral Cognitive Score (Mindstreams , NeuroTrax Corp, Israel) (primary outcomes in the study). Data were collected at T0 (baseline), at T1 (6 weeks) | Executive function scores increased after training in both groups (p = 0.032). Although no significant differences between training arms were found |
|                             |                               |                    | Group 1: n= 30; 22/8  | Group 1: 70.1 ± 1.3 |        |                                                                                                                                                                                                                          |                                                                                                                                          |                                                                                                                                                        |                                                                                                                                                     |
|                             |                               |                    | Group 2: n= 34; 23/11 | Group 2: 73.1 ± 1.1 |        |                                                                                                                                                                                                                          |                                                                                                                                          |                                                                                                                                                        |                                                                                                                                                     |

|                                      |               |       |                        |                            |    |                                                                                                                                                                                                                                                                                                                     |                                                                                                                                                                                               |                                                                                                                               |                                                                       |
|--------------------------------------|---------------|-------|------------------------|----------------------------|----|---------------------------------------------------------------------------------------------------------------------------------------------------------------------------------------------------------------------------------------------------------------------------------------------------------------------|-----------------------------------------------------------------------------------------------------------------------------------------------------------------------------------------------|-------------------------------------------------------------------------------------------------------------------------------|-----------------------------------------------------------------------|
|                                      |               |       |                        |                            |    | front of the treadmill                                                                                                                                                                                                                                                                                              |                                                                                                                                                                                               |                                                                                                                               |                                                                       |
| Pazzaglia<br><i>C et al.</i><br>2017 | Physiotherapy | Italy | Total: n=51; 35 / 16   | Total: N/A                 | ≤V | Group 1: Participants underwent a semi-immersive VR system (Nirvana, BTS), 3 sessions/week, 40 minutes each, for 6 weeks. The device is connected to a projector and a big screen, it reproduces an interactive series of exercises, and it creates interactivity thanks to the infrared video camera analyzing the | Group 2: The conventional rehabilitation program was performed according to the national guidelines for physical therapy in patients with PD, 3 sessions a week, 40 minutes each, for 6 weeks | Short-form 36 mental composite score (secondary outcomes in the study). Data were collected at T0 (baseline), at T1 (6 weeks) | Significative improvements were observed only in VR group (p = 0.037) |
|                                      |               |       | Group 1: n= 25; 18 / 7 | Group 1: 72.0 ± 7.0 years  |    |                                                                                                                                                                                                                                                                                                                     |                                                                                                                                                                                               |                                                                                                                               |                                                                       |
|                                      |               |       | Group 2: n= 10; 17 / 9 | Group 2: 70.0 ± 10.0 years |    |                                                                                                                                                                                                                                                                                                                     |                                                                                                                                                                                               |                                                                                                                               |                                                                       |



|                               |               |             |                    |                     |      |                                                                                                                                                                                                                                                |                                                                                                                  |                                                                                                                 |                                                                                                                                                                                         |
|-------------------------------|---------------|-------------|--------------------|---------------------|------|------------------------------------------------------------------------------------------------------------------------------------------------------------------------------------------------------------------------------------------------|------------------------------------------------------------------------------------------------------------------|-----------------------------------------------------------------------------------------------------------------|-----------------------------------------------------------------------------------------------------------------------------------------------------------------------------------------|
|                               |               |             |                    |                     |      | patient's movements                                                                                                                                                                                                                            |                                                                                                                  |                                                                                                                 |                                                                                                                                                                                         |
| Pompeu JUC <i>et al.</i> 2012 | Physiotherapy | Brasil      | Total: n=32; 17/15 | Total: 67.4 ± 8.1   | ≤II  | Group 1: Participants underwent global exercise + Nintendo Wii and Cognitive training, 2 times/week for 7 weeks (14 sessions). The cognitive demands of the games were attention to solve the tasks, working memory and performance management | Group 2: Participants underwent global exercise+balance exercise training 2 times/week for 7 weeks (14 sessions) | MOCA(secondary outcomes in the study). Data were collected at T0 (baseline), at T1 (7 weeks), and T2 (15 weeks) | Both groups showed a significant improvement on MOCA after training that was maintained at follow-up( p < 0.05), but no difference between the groups was found at any time ( p > 0.05) |
|                               |               |             | Group 1: n= 16; NA | Group 1: 68.6 ± 8.0 |      |                                                                                                                                                                                                                                                |                                                                                                                  |                                                                                                                 |                                                                                                                                                                                         |
|                               |               |             | Group 2: n= 16; NA | Group 2: 66.2 ± 8.3 |      |                                                                                                                                                                                                                                                |                                                                                                                  |                                                                                                                 |                                                                                                                                                                                         |
|                               | Eur Neurol    | Netherlands | Total: n= 41; NA   | Total: N/A          | ≤III | Group 1: Participants                                                                                                                                                                                                                          | Group 2: Waiting list                                                                                            | Global MyCQ score                                                                                               | Global cognition                                                                                                                                                                        |

|                                  |           |             |                            |                            |    |                                                                                                                                                                                 |                                                                                                                                                       |                                                                                                                                              |                                                                                                        |
|----------------------------------|-----------|-------------|----------------------------|----------------------------|----|---------------------------------------------------------------------------------------------------------------------------------------------------------------------------------|-------------------------------------------------------------------------------------------------------------------------------------------------------|----------------------------------------------------------------------------------------------------------------------------------------------|--------------------------------------------------------------------------------------------------------|
| Van de Weijer <i>et al.</i> 2020 |           |             | Group 1:<br>21; NA         | Group 1:<br>64.65±7.4<br>0 |    | performed an online cognitive game (AquaSnap™) at home using an internet browser for 3 sessions/week, 30 min each, for 12 weeks                                                 |                                                                                                                                                       | (primary outcomes in the study)<br>Data were collected at T0 (baseline), at T1 (12 weeks), at T2 (24 weeks)                                  | scores improved in the group 1 after 24 weeks of training compared to group 2 (p = 0.049)              |
|                                  |           |             | Group 2:<br>n= 20; NA      | Group 2:<br>64.01±7.4<br>1 |    |                                                                                                                                                                                 |                                                                                                                                                       |                                                                                                                                              |                                                                                                        |
| Zimmermann <i>et al.</i> 2014    | Neurology | Switzerland | Total: n= 39; 15/14        | Total: N/A                 | ≤V | Group 1: participants performed Cogniplus, 3 times/week for 4 weeks. CogniPlus is a specific cognitive exergame program. Each patient performed 4 different tasks for attention | Group 2: Participants performed Nintendo Wii training, 3 times/week for 4 weeks, for 10 minutes. In each session, the patients played 4 sports games: | Tests of Attentional Performance alertness, TM); the Block-Design Test, the California Verbal Learning Test (primary outcomes in the study). | There was a significant difference in attention after Wii training compared with CogniPlus (p = 0.019) |
|                                  |           |             | Group 1:<br>n= 19;<br>13/6 | Group 1:<br>69.9 ± 6.3     |    |                                                                                                                                                                                 |                                                                                                                                                       |                                                                                                                                              |                                                                                                        |
|                                  |           |             | Group 2:<br>n= 20;<br>12/8 | Group 2:<br>66.3 ± 9.7     |    |                                                                                                                                                                                 |                                                                                                                                                       |                                                                                                                                              |                                                                                                        |

|                                                                                                                                                                                                                                                                                                                                                                                                                                                                                                                                                                                                                                                                |  |  |  |  |  |                                |                                            |                                                       |  |
|----------------------------------------------------------------------------------------------------------------------------------------------------------------------------------------------------------------------------------------------------------------------------------------------------------------------------------------------------------------------------------------------------------------------------------------------------------------------------------------------------------------------------------------------------------------------------------------------------------------------------------------------------------------|--|--|--|--|--|--------------------------------|--------------------------------------------|-------------------------------------------------------|--|
|                                                                                                                                                                                                                                                                                                                                                                                                                                                                                                                                                                                                                                                                |  |  |  |  |  | memory and executive functions | Tennis, Swordplay, Archery, and Air Sports | Data were collected at T0 (baseline), at T1 (4 weeks) |  |
| <p>Abbreviations: M: Male, F: Female; TMT-A: Trail making test part A; TMT-B: Trail Making test part B; MOCA: Montreal Cognitive Assessment; BAI: Beck Anxiety Inventory; TT: Treadmill; VR: Virtual reality; RAGT: Robot-Assisted Gait training; FIM: Functional Independence Measure; ACE-R; Addenbrooke Cognitive Examination–Revised; ACE-R AO; Attention and Orientation; ACE-R M: ACE-R Memory; ACE-R F: ACE- R Fluency; ACE-R L:ACE-R Language; ACE-R VS: ACE-R Visual-Spatial; FAB, Frontal Assessment Battery; GDS, Geriatric Depression Scale; HRS-A, Hamilton Rating Scale for Anxiety; MMSE, Mini-Mental State Examination; WEIGL, Weigl test.</p> |  |  |  |  |  |                                |                                            |                                                       |  |
